# Supplementary material for: Exploring the Link between Hydrodynamic Size and Immunoglobulins of Circulating Immune Complexes in Rheumatoid Arthritis Patients
Source: MDPI journal article supplement (doi:10.3390/ijms25063138), 2024-03-08
Supplement: s1 [file s1]

## **Supplementary material**

### **Table S1 – Clinical data and CIC IgA, IgG and IgM relative content**

Excel file: Supplementary material Table S1.xlsx

**Table S2.** The correlation between the RF and ACPA titre and between the titres and measured parameters of inflammation (SER and CRP) and disease activity in RA patients.

|                 |                   | r           | p                 |
|-----------------|-------------------|-------------|-------------------|
| <b>RF titre</b> | <b>ACPA titre</b> | <b>0.70</b> | <b>&lt; 0.001</b> |
| RF titre        | SER (mm/h)        | 0.19        | 0.31              |
|                 | CRP (mg/L)        | -0.13       | 0.51              |
|                 | DAS28             | 0.10        | 0.65              |
| ACPA titre      | SER (mm/h)        | 0.10        | 0.58              |
|                 | CRP (mg/L)        | 0.04        | 0.84              |
|                 | DAS28             | 0.06        | 0.78              |

SER – the erythrocyte sedimentation rate (mm/hours);

CRP –the concentration of C reactive protein (mg/L);

DAS28 – disease activity score

**Table S3.** The correlation between the level of CIC and the CIC immunoglobulin content in control and RA group (a) the correlation between serum ACPA or RF level and the CIC level and the CIC immunoglobulin content in RA group (b) and the between the level of CIC level and CIC Ig contents with parameters of inflammation (SE and CRP) and disease activity in RA patients (c).

| (a)       |           |           | r     | p       |          |           |           |       |       | r | p |  |
|-----------|-----------|-----------|-------|---------|----------|-----------|-----------|-------|-------|---|---|--|
| Control   | CIC level | CIC IgA   | 0.68  | < 0.001 |          |           |           |       |       |   |   |  |
|           |           | CIC IgG   | 0.63  | < 0.001 |          |           |           |       |       |   |   |  |
|           |           | CIC IgM   | 0.48  | 0.007   |          |           |           |       |       |   |   |  |
| RA<br>all | CIC level | CIC IgA   | 0.27  | n.s.    | RA       | CIC level | CIC IgA   | 0.07  | n.s.  |   |   |  |
|           |           | CIC IgG   | 0.29  | n.s.    | ACPA+RF+ |           | CIC IgG   | 0.09  | n.s.  |   |   |  |
|           |           | CIC IgM   | 0.65  | < 0.001 |          |           | CIC IgM   | 0.54  | 0.01  |   |   |  |
| (b)       |           |           | r     | p       |          |           |           |       |       | r | p |  |
| RA<br>all | ACPA      | CIC level | -0.23 | n.s.    | RA       | ACPA      | CIC level | -0.62 | 0.003 |   |   |  |
|           |           | CIC IgA   | 0.45  | 0.012   | ACPA+RF+ |           | CIC IgA   | 0.32  | n.s.  |   |   |  |
|           |           | CIC IgG   | 0.29  | n.s.    |          |           | CIC IgG   | 0.26  | n.s.  |   |   |  |
|           |           | CIC IgM   | 0.12  | n.s.    |          |           | CIC IgM   | -0.17 | n.s.  |   |   |  |
| RA<br>all | RF        | CIC level | 0.09  | n.s.    | RA       | RF        | CIC level | -0.09 | n.s.  |   |   |  |
|           |           | CIC IgA   | 0.51  | 0.004   | ACPA+RF+ |           | CIC IgA   | 0.37  | n.s.  |   |   |  |
|           |           | CIC IgG   | 0.37  | 0.046   |          |           | CIC IgG   | 0.46  | 0.04  |   |   |  |
|           |           | CIC IgM   | 0.38  | 0.036   |          |           | CIC IgM   | 0.18  | n.s.  |   |   |  |
| RA        | ACPA      | RF        |       |         |          |           |           |       |       |   |   |  |
| (c)       |           |           |       |         |          |           |           |       |       |   |   |  |
| RA<br>all | CIC level | CRP       | 0.36  | n.s.    |          |           |           |       |       |   |   |  |
|           |           | SER       | 0.35  | n.s.    |          |           |           |       |       |   |   |  |
|           |           | DAS28     | 0.38  | n.s.    |          |           |           |       |       |   |   |  |

CIC level – OD<sub>350</sub> level of redissolved PEG precipitated serum protein (PEG precipitable CIC);  
r – correlation coefficient; significant correlation -  $p < 0.05$ . n.s. – non significant correlation.  $p \geq 0.05$ .  
ACPA: serum titre of ACPAs; RF: serum titre of RF; SER – the erythrocyte sedimentation rate (mm/hours)  
CRP – the concentration of C reactive protein (mg/L); DAS28 – disease activity score

**Table S4.** The association (a) between CIC immunoglobulin content and CIC level in RA and control CIC and (b) between CIC immunoglobulin content and serum ACPA and RF in RA.

| <b>(a)</b> |                   |       |             |       |       |             |       |       |             |       |       |             |
|------------|-------------------|-------|-------------|-------|-------|-------------|-------|-------|-------------|-------|-------|-------------|
| Ctrl CIC   | IgM ↑             | IgM ↓ | <i>p</i>    | IgA ↑ | IgA ↓ | <i>p</i>    | IgG ↑ | IgG ↓ | <i>p</i>    | Ig ↑  | Ig ↓  | <i>p</i>    |
|            | median value      |       |             |       |       |             |       |       |             |       |       |             |
| OD350 nm   | 0.503             | 0.285 | 0.016       | 0.540 | 0.285 | <0.001      | 0.503 | 0.285 | 0.007       | 0.833 | 0.285 | 0.002       |
| CIC IgA    | 1.07              | 0.54  | 0.008       | 0.98  | 0.58  | <0.001      | 0.98  | 0.59  | 0.023       | 1.07  | 0.54  | <0.001      |
| CIC IgG    | 1.22              | 0.78  | <0.001      | 1.23  | 0.55  | <0.001      | 1.22  | 0.78  | <0.001      | 1.27  | 0.55  | <0.001      |
| CIC IgM    | 1.06              | 0.78  | <0.001      | 1.11  | 0.80  | 0.003       | 1.11  | 0.78  | 0.014       | 1.15  | 0.73  | <0.001      |
| RA CIC     | IgM ↑             | IgM ↓ | <i>p</i>    | IgA ↑ | IgA ↓ | <i>p</i>    | IgG ↑ | IgG ↓ | <i>p</i>    | Ig ↑  | Ig ↓  | <i>p</i>    |
|            | median value      |       |             |       |       |             |       |       |             |       |       |             |
| OD350 nm   | 0.621             | 0.312 | 0.001       | 0.549 | 0.352 | <i>n.s.</i> | 0.523 | 0.350 | <i>n.s.</i> | 0.536 | 0.322 | 0.031       |
| CIC IgA    | 1.20              | 0.59  | <i>n.s.</i> | 1.20  | 0.68  | <0.001      | 1.15  | 0.59  | 0.002       | 1.37  | 0.54  | 0.002       |
| CIC IgG    | 1.34              | 1.13  | 0.052       | 1.56  | 1.01  | 0.004       | 1.55  | 1.07  | <0.001      | 1.45  | 0.94  | <0.001      |
| CIC IgM    | 1.17              | 0.91  | <0.001      | 1.17  | 0.88  | 0.002       | 1.17  | 0.87  | 0.003       | 1.18  | 0.87  | <0.001      |
| <b>(b)</b> |                   |       |             |       |       |             |       |       |             |       |       |             |
| RA CIC     | IgM ↑             | IgM ↓ | <i>p</i>    | IgA ↑ | IgA ↓ | <i>p</i>    | IgG ↑ | IgG ↓ | <i>p</i>    | Ig ↑  | Ig ↓  | <i>p</i>    |
|            | number of samples |       |             |       |       |             |       |       |             |       |       |             |
| ACPA+RF+   | 12                | 8     |             | 13    | 7     |             | 11    | 9     |             | 6     | 4     |             |
| ACPA+RF-   | 0                 | 3     | <i>n.s.</i> | 0     | 3     | <i>n.s.</i> | 1     | 2     | <i>n.s.</i> | 1     | 2     | <i>n.s.</i> |
| ACPA-RF+   | 1                 | 0     |             | 0     | 1     |             | 0     | 1     |             | 0     | 0     |             |
| ACPA-RF-   | 1                 | 4     |             | 2     | 4     |             | 3     | 3     |             | 3     | 3     |             |
| RA CIC     | IgM ↑             | IgM ↓ | <i>p</i>    | IgA ↑ | IgA ↓ | <i>p</i>    | IgG ↑ | IgG ↓ | <i>p</i>    | Ig ↑  | Ig ↓  | <i>p</i>    |
|            | median value      |       |             |       |       |             |       |       |             |       |       |             |
| ACPA titer | 236               | 304   | <i>n.s.</i> | 365   | 255   | <i>n.s.</i> | 439   | 113   | 0.014       | 439   | 220   | <i>n.s.</i> |
| RF titer   | 108               | 81    |             | 99    | 89    |             | 128   | 72    | 0.015       | 122   | 69    |             |

ACPA+RF+; ACPA+RF-. ACPA-RF+. ACPA-RF-: Subgroups of RA patients formed based on the presence of the serum ACPA or RF autoantibodies.

IgA↑. IgM ↑. IgG↑ - The CIC samples with the IgM. IgG or IgG level above the median value;  
 IgA ↓. IgM ↓. IgG - The CIC samples with the IgM. IgG or IgG level below the median value;  
 CIC Ig ↑ - CIC samples having all immunoglobulin classes above the median value;  
 CIC Ig ↓ - CIC samples having all immunoglobulin classes below the median value.

**Table S5 –DLS data**

Excel file: Supplementary material Table S5.xlsx

Sheet 1 DLS data for control CIC

Sheet 2 DLS data for RA CIC

**Table S6 – DLS data analysis – Numeric data presented in Figure 4**

| (a) | CIC particles |         |    | p     |
|-----|---------------|---------|----|-------|
|     | No            |         |    |       |
|     | rh<br>(nm)    | Control | RA |       |
|     | 1.7           | 1       |    | n.s.  |
|     | 2.7           |         | 1  | n.s.  |
|     | 3.6           |         | 4  | n.s.  |
|     | 4.2           | 1       | 1  | n.s.  |
|     | 4.8           | 1       | 1  | n.s.  |
|     | 5.6           | 4       | 5  | n.s.  |
|     | 6.5           | 6       | 9  | n.s.  |
|     | 7.5           | 11      | 11 | n.s.  |
|     | 8.7           | 19      | 25 | n.s.  |
|     | 10.1          | 23      | 28 | n.s.  |
|     | 11.7          | 17      | 21 | n.s.  |
|     | 13.5          | 28      | 23 | n.s.  |
|     | 15.7          | 31      | 27 | n.s.  |
|     | 18.2          | 29      | 23 | n.s.  |
|     | 21.0          | 26      | 30 | n.s.  |
|     | 24.4          | 35      | 30 | n.s.  |
|     | 28.2          | 19      | 36 | 0.019 |
|     | 32.7          | 26      | 33 | n.s.  |
|     | 37.8          | 35      | 27 | n.s.  |
|     | 43.8          | 42      | 25 | n.s.  |
|     | 50.8          | 30      | 32 | n.s.  |
|     | 58.9          | 26      | 24 | n.s.  |
|     | 68.1          | 25      | 26 | n.s.  |
|     | 78.8          | 49      | 32 | 0.095 |
|     | 91.3          | 31      | 25 | n.s.  |
|     | 106           | 25      | 29 | n.s.  |
|     | 122           | 30      | 39 | n.s.  |
|     | 142           | 23      | 26 | n.s.  |
|     | 164           | 26      | 22 | n.s.  |
|     | 190           | 13      | 12 | n.s.  |
|     | 220           | 15      | 15 | n.s.  |
|     | 255           | 10      | 11 | n.s.  |
|     | 295           | 14      | 13 | n.s.  |
|     | 342           | 13      | 16 | n.s.  |
|     | 396           | 20      | 15 | n.s.  |
|     | 459           | 17      | 21 | n.s.  |
|     | 531           | 14      | 26 | 0.067 |
|     | 615           | 22      | 32 | n.s.  |
|     | 712           | 15      | 24 | 0.069 |
|     | 825           | 35      | 24 | n.s.  |
|     | 955           | 36      | 22 | n.s.  |
|     | 1106          | 29      | 19 | n.s.  |
|     | 1281          | 15      | 21 | n.s.  |
|     | 1484          | 15      | 14 | n.s.  |
|     | 1718          | 7       | 18 | n.s.  |
|     | 1990          | 10      | 8  | n.s.  |
|     | 2305          | 6       | 3  | n.s.  |
|     | 2669          | 3       | 3  | n.s.  |
|     | 3091          | 1       | 2  | n.s.  |
|     | 3580          | 8       | 2  | n.s.  |
|     | 4145          | 3       | 2  | n.s.  |
|     | 4801          | 4       |    | n.s.  |
|     | Max           | 49      | 39 |       |

| (b) | Individual CIC |     |      |     |      | p     |
|-----|----------------|-----|------|-----|------|-------|
|     | Control        |     | RA   |     |      |       |
|     | rh<br>(nm)     | w/o | with | w/o | with |       |
|     | 1.7            | 29  | 1    | 30  | 0    | n.s.  |
|     | 2.7            | 30  | 0    | 29  | 1    | n.s.  |
|     | 3.6            | 30  | 0    | 26  | 4    | n.s.  |
|     | 4.2            | 29  | 1    | 29  | 1    | n.s.  |
|     | 4.8            | 29  | 1    | 29  | 1    | n.s.  |
|     | 5.6            | 27  | 3    | 26  | 4    | n.s.  |
|     | 6.5            | 26  | 4    | 24  | 6    | n.s.  |
|     | 7.5            | 22  | 8    | 21  | 9    | n.s.  |
|     | 8.7            | 17  | 13   | 16  | 14   | n.s.  |
|     | 10.1           | 18  | 12   | 16  | 14   | n.s.  |
|     | 11.7           | 18  | 12   | 18  | 12   | n.s.  |
|     | 13.5           | 14  | 16   | 13  | 17   | n.s.  |
|     | 15.7           | 11  | 19   | 15  | 15   | n.s.  |
|     | 18.2           | 15  | 15   | 14  | 16   | n.s.  |
|     | 21.0           | 14  | 16   | 14  | 16   | n.s.  |
|     | 24.4           | 11  | 19   | 12  | 18   | n.s.  |
|     | 28.2           | 20  | 10   | 10  | 20   | 0.019 |
|     | 32.7           | 13  | 17   | 10  | 20   | n.s.  |
|     | 37.8           | 14  | 16   | 15  | 15   | n.s.  |
|     | 43.8           | 8   | 22   | 14  | 16   | n.s.  |
|     | 50.8           | 13  | 17   | 16  | 14   | n.s.  |
|     | 58.8           | 15  | 15   | 15  | 15   | n.s.  |
|     | 68.1           | 12  | 18   | 15  | 15   | n.s.  |
|     | 78.8           | 6   | 24   | 13  | 17   | 0.095 |
|     | 91.3           | 12  | 18   | 18  | 12   | n.s.  |
|     | 106            | 18  | 12   | 12  | 18   | n.s.  |
|     | 122            | 10  | 20   | 11  | 19   | n.s.  |
|     | 142            | 16  | 14   | 12  | 18   | n.s.  |
|     | 164            | 16  | 14   | 15  | 15   | n.s.  |
|     | 190            | 19  | 11   | 22  | 8    | n.s.  |
|     | 220            | 20  | 10   | 16  | 14   | n.s.  |
|     | 255            | 23  | 7    | 23  | 7    | n.s.  |
|     | 295            | 19  | 11   | 20  | 10   | n.s.  |
|     | 342            | 21  | 9    | 16  | 14   | n.s.  |
|     | 396            | 19  | 11   | 18  | 12   | n.s.  |
|     | 459            | 17  | 13   | 16  | 14   | n.s.  |
|     | 531            | 21  | 9    | 13  | 17   | 0.067 |
|     | 615            | 18  | 12   | 13  | 17   | n.s.  |
|     | 712            | 18  | 12   | 10  | 20   | 0.069 |
|     | 825            | 13  | 17   | 14  | 16   | n.s.  |
|     | 955            | 15  | 15   | 16  | 14   | n.s.  |
|     | 1106           | 13  | 17   | 17  | 13   | n.s.  |
|     | 1281           | 18  | 12   | 15  | 15   | n.s.  |
|     | 1484           | 19  | 11   | 20  | 10   | n.s.  |
|     | 1718           | 23  | 7    | 17  | 13   | n.s.  |
|     | 1990           | 21  | 9    | 23  | 7    | n.s.  |
|     | 2305           | 25  | 5    | 27  | 3    | n.s.  |
|     | 2669           | 27  | 3    | 27  | 3    | n.s.  |
|     | 3091           | 29  | 1    | 29  | 1    | n.s.  |
|     | 3580           | 26  | 4    | 28  | 2    | n.s.  |
|     | 4145           | 27  | 3    | 28  | 2    | n.s.  |
|     | 4801           | 27  | 3    | 30  |      | n.s.  |
|     | Max            |     | 24   |     | 20   |       |

**Table S7a – DLS analysis – Numeric data presented in Figure 6a\_IgA**

| rh<br>(nm) | Ctrl<br>(n) | RA<br>(n) | Ctrl IgA    |             | RA IgA      |             | IgA<br>RA/Ctrl | <i>p</i>     |
|------------|-------------|-----------|-------------|-------------|-------------|-------------|----------------|--------------|
|            |             |           | mean        | SD          | mean        | SD          |                |              |
| 1.7        | 1           | 0         | <b>1.41</b> |             |             |             |                |              |
| 2.7        | 0           | 1         |             |             |             | <b>1.56</b> |                |              |
| 3.6        | 0           | 4         |             |             |             | <b>1.54</b> | 0.34           |              |
| 4.2        | 1           | 1         |             | <b>0.06</b> |             | <b>1.97</b> |                |              |
| 4.8        | 1           | 1         |             | <b>0.87</b> |             | <b>0.87</b> |                |              |
| 5.6        | 3           | 4         |             | <b>0.76</b> | 0.49        | <b>1.44</b> | 0.46           | <b>1.88</b>  |
| 6.5        | 4           | 7         | <b>0.79</b> | 0.49        | <b>1.33</b> | 0.32        | <b>1.68</b>    | <i>0.054</i> |
| 7.5        | 8           | 9         | <b>0.79</b> | 0.46        | <b>1.32</b> | 0.40        | <b>1.67</b>    | <i>0.024</i> |
| 8.7        | 13          | 14        | <b>0.97</b> | 0.50        | <b>1.28</b> | 0.35        | <b>1.32</b>    | <i>n.s</i>   |
| 10.1       | 12          | 14        | <b>0.93</b> | 0.43        | <b>1.43</b> | 0.43        | <b>1.54</b>    | <i>n.s</i>   |
| 11.7       | 12          | 12        | <b>1.07</b> | 0.37        | <b>1.39</b> | 0.44        | <b>1.30</b>    | <i>n.s</i>   |
| 13.5       | 16          | 17        | <b>0.87</b> | 0.30        | <b>1.33</b> | 0.42        | <b>1.52</b>    | <i>0.001</i> |
| 15.7       | 19          | 15        | <b>0.97</b> | 0.41        | <b>1.37</b> | 0.46        | <b>1.42</b>    | <i>0.010</i> |
| 18.2       | 15          | 16        | <b>0.82</b> | 0.35        | <b>1.18</b> | 0.33        | <b>1.43</b>    | <i>0.007</i> |
| 21.0       | 17          | 16        | <b>0.91</b> | 0.40        | <b>1.43</b> | 0.39        | <b>1.57</b>    | <i>0.001</i> |
| 24.4       | 20          | 18        | <b>0.95</b> | 0.45        | <b>1.33</b> | 0.40        | <b>1.40</b>    | <i>0.009</i> |
| 28.2       | 10          | 20        | <b>0.93</b> | 0.43        | <b>1.27</b> | 0.41        | <b>1.36</b>    | <i>0.045</i> |
| 32.7       | 18          | 20        | <b>1.09</b> | 0.49        | <b>1.31</b> | 0.40        | <b>1.20</b>    | <i>n.s</i>   |
| 37.9       | 16          | 15        | <b>0.99</b> | 0.48        | <b>1.41</b> | 0.41        | <b>1.43</b>    | <i>0.013</i> |
| 43.8       | 22          | 16        | <b>0.98</b> | 0.43        | <b>1.43</b> | 0.40        | <b>1.46</b>    | <i>0.002</i> |
| 50.8       | 17          | 14        | <b>0.88</b> | 0.38        | <b>1.34</b> | 0.35        | <b>1.52</b>    | <i>0.002</i> |
| 58.8       | 15          | 16        | <b>0.92</b> | 0.43        | <b>1.21</b> | 0.40        | <b>1.32</b>    | <i>n.s</i>   |
| 68.0       | 18          | 16        | <b>0.93</b> | 0.40        | <b>1.29</b> | 0.39        | <b>1.38</b>    | <i>0.013</i> |
| 78.8       | 24          | 18        | <b>0.95</b> | 0.39        | <b>1.30</b> | 0.44        | <b>1.37</b>    | <i>0.009</i> |
| 91.2       | 18          | 13        | <b>0.87</b> | 0.37        | <b>1.37</b> | 0.47        | <b>1.57</b>    | <i>0.003</i> |
| 106        | 12          | 18        | <b>0.87</b> | 0.38        | <b>1.25</b> | 0.46        | <b>1.44</b>    | <i>0.024</i> |
| 122        | 20          | 19        | <b>0.96</b> | 0.47        | <b>1.26</b> | 0.45        | <b>1.31</b>    | <i>0.053</i> |
| 142        | 14          | 18        | <b>1.00</b> | 0.48        | <b>1.35</b> | 0.41        | <b>1.35</b>    | <i>0.035</i> |
| 164        | 14          | 15        | <b>1.07</b> | 0.49        | <b>1.34</b> | 0.40        | <b>1.25</b>    | <i>n.s</i>   |
| 190        | 11          | 8         | <b>1.09</b> | 0.35        | <b>1.29</b> | 0.32        | <b>1.18</b>    | <i>n.s</i>   |
| 220        | 10          | 14        | <b>0.99</b> | 0.41        | <b>1.34</b> | 0.34        | <b>1.36</b>    | <i>0.030</i> |
| 255        | 7           | 7         | <b>0.94</b> | 0.36        | <b>1.42</b> | 0.45        | <b>1.50</b>    | <i>0.051</i> |
| 295        | 11          | 10        | <b>0.94</b> | 0.43        | <b>1.20</b> | 0.30        | <b>1.28</b>    | <i>n.s</i>   |
| 342        | 9           | 14        | <b>0.93</b> | 0.43        | <b>1.35</b> | 0.37        | <b>1.44</b>    | <i>0.022</i> |
| 396        | 11          | 12        | <b>0.71</b> | 0.49        | <b>1.18</b> | 0.33        | <b>1.67</b>    | <i>0.012</i> |
| 459        | 13          | 14        | <b>1.01</b> | 0.28        | <b>1.23</b> | 0.44        | <b>1.22</b>    | <i>n.s</i>   |
| 531        | 9           | 17        | <b>0.87</b> | 0.32        | <b>1.21</b> | 0.36        | <b>1.39</b>    | <i>0.027</i> |
| 615        | 12          | 17        | <b>0.93</b> | 0.35        | <b>1.31</b> | 0.38        | <b>1.41</b>    | <i>0.009</i> |
| 712        | 12          | 20        | <b>0.76</b> | 0.37        | <b>1.31</b> | 0.43        | <b>1.74</b>    | <i>0.001</i> |
| 825        | 17          | 16        | <b>0.76</b> | 0.45        | <b>1.30</b> | 0.45        | <b>1.70</b>    | <i>0.002</i> |
| 955        | 15          | 14        | <b>0.92</b> | 0.36        | <b>1.33</b> | 0.44        | <b>1.45</b>    | <i>0.010</i> |
| 1106       | 17          | 13        | <b>0.97</b> | 0.46        | <b>1.49</b> | 0.42        | <b>1.55</b>    | <i>0.003</i> |
| 1281       | 12          | 15        | <b>1.11</b> | 0.39        | <b>1.35</b> | 0.47        | <b>1.22</b>    | <i>n.s</i>   |
| 1484       | 11          | 10        | <b>1.13</b> | 0.37        | <b>1.37</b> | 0.29        | <b>1.21</b>    | <i>n.s</i>   |
| 1718       | 7           | 13        | <b>1.20</b> | 0.28        | <b>1.42</b> | 0.43        | <b>1.19</b>    | <i>n.s</i>   |
| 1990       | 9           | 7         | <b>1.18</b> | 0.49        | <b>1.42</b> | 0.43        | <b>1.21</b>    | <i>n.s</i>   |
| 2305       | 5           | 3         | <b>1.25</b> | 0.23        | <b>1.32</b> | 0.35        | <b>1.06</b>    | <i>n.s</i>   |
| 2669       | 3           | 3         | <b>1.29</b> | 0.23        | <b>1.16</b> | 0.44        | <b>0.90</b>    | <i>n.s</i>   |
| 3091       | 1           | 1         | <b>1.22</b> |             | <b>1.67</b> |             | <b>1.37</b>    |              |
| 3580       | 4           | 2         | <b>1.25</b> | 0.26        | <b>1.38</b> |             |                |              |
| 4145       | 3           | 2         | <b>1.16</b> | 0.28        | <b>1.09</b> |             |                |              |
| 4801       | 3           | 0         | <b>0.67</b> | 0.59        |             |             |                |              |

**Table S7b – DLS analysis – Numeric data presented in Figure 6b\_IgG**

| rh<br>(nm) | Ctrl<br>(n) | RA<br>(n) | Ctrl IgG    |      | RA IgG      |      | IgG<br>RA/Ctrl | <i>p</i>     |
|------------|-------------|-----------|-------------|------|-------------|------|----------------|--------------|
|            |             |           | mean        | SD   | mean        | SD   |                |              |
| 1.7        | 1           | 0         | <b>1.29</b> |      |             |      |                |              |
| 2.7        | 0           | 1         |             |      | <b>0.98</b> |      |                |              |
| 3.6        | 0           | 4         |             |      | <b>0.97</b> | 0.22 |                |              |
| 4.2        | 1           | 1         | <b>0.27</b> |      | <b>1.13</b> |      |                |              |
| 4.8        | 1           | 1         | <b>0.87</b> |      | <b>0.81</b> |      |                |              |
| 5.6        | 3           | 4         | <b>0.88</b> | 0.27 | <b>1.10</b> | 0.20 | <b>1.25</b>    | <i>n.s</i>   |
| 6.5        | 4           | 7         | <b>0.88</b> | 0.18 | <b>1.03</b> | 0.11 | <b>1.17</b>    | <i>n.s</i>   |
| 7.5        | 8           | 9         | <b>0.77</b> | 0.24 | <b>1.05</b> | 0.28 | <b>1.36</b>    | <i>0.045</i> |
| 8.7        | 13          | 14        | <b>0.94</b> | 0.28 | <b>1.00</b> | 0.17 | <b>1.07</b>    | <i>n.s</i>   |
| 10.1       | 12          | 14        | <b>0.98</b> | 0.19 | <b>1.08</b> | 0.26 | <b>1.10</b>    | <i>n.s</i>   |
| 11.7       | 12          | 12        | <b>0.94</b> | 0.16 | <b>1.09</b> | 0.24 | <b>1.16</b>    | <i>n.s</i>   |
| 13.5       | 16          | 17        | <b>0.90</b> | 0.17 | <b>1.01</b> | 0.21 | <b>1.12</b>    | <i>n.s</i>   |
| 15.7       | 19          | 15        | <b>0.95</b> | 0.22 | <b>1.05</b> | 0.26 | <b>1.10</b>    | <i>n.s</i>   |
| 18.2       | 15          | 16        | <b>0.84</b> | 0.18 | <b>0.99</b> | 0.17 | <b>1.18</b>    | <i>0.023</i> |
| 21.0       | 17          | 16        | <b>0.92</b> | 0.20 | <b>1.09</b> | 0.23 | <b>1.19</b>    | <i>0.026</i> |
| 24.4       | 20          | 18        | <b>0.92</b> | 0.23 | <b>1.10</b> | 0.22 | <b>1.20</b>    | <i>0.015</i> |
| 28.2       | 10          | 20        | <b>0.95</b> | 0.19 | <b>1.02</b> | 0.25 | <b>1.07</b>    | <i>n.s</i>   |
| 32.7       | 18          | 20        | <b>0.97</b> | 0.24 | <b>1.03</b> | 0.25 | <b>1.06</b>    | <i>n.s</i>   |
| 37.9       | 16          | 15        | <b>0.94</b> | 0.25 | <b>1.05</b> | 0.24 | <b>1.12</b>    | <i>n.s</i>   |
| 43.8       | 22          | 16        | <b>0.92</b> | 0.24 | <b>1.07</b> | 0.26 | <b>1.17</b>    | <i>n.s</i>   |
| 50.8       | 17          | 14        | <b>0.88</b> | 0.24 | <b>1.02</b> | 0.24 | <b>1.16</b>    | <i>n.s</i>   |
| 58.8       | 15          | 16        | <b>0.90</b> | 0.22 | <b>0.99</b> | 0.25 | <b>1.10</b>    | <i>n.s</i>   |
| 68.0       | 18          | 16        | <b>0.92</b> | 0.22 | <b>0.99</b> | 0.24 | <b>1.07</b>    | <i>n.s</i>   |
| 78.8       | 24          | 18        | <b>0.93</b> | 0.19 | <b>1.03</b> | 0.23 | <b>1.11</b>    | <i>n.s</i>   |
| 91.2       | 18          | 13        | <b>0.90</b> | 0.21 | <b>1.06</b> | 0.27 | <b>1.18</b>    | <i>n.s</i>   |
| 106        | 12          | 18        | <b>0.89</b> | 0.18 | <b>1.03</b> | 0.24 | <b>1.16</b>    | <i>n.s</i>   |
| 122        | 20          | 19        | <b>0.94</b> | 0.27 | <b>1.02</b> | 0.23 | <b>1.09</b>    | <i>n.s</i>   |
| 142        | 14          | 18        | <b>0.95</b> | 0.21 | <b>1.02</b> | 0.24 | <b>1.07</b>    | <i>n.s</i>   |
| 164        | 14          | 15        | <b>0.92</b> | 0.28 | <b>1.02</b> | 0.22 | <b>1.11</b>    | <i>n.s</i>   |
| 190        | 11          | 8         | <b>1.00</b> | 0.19 | <b>1.01</b> | 0.19 | <b>1.01</b>    | <i>n.s</i>   |
| 220        | 10          | 14        | <b>0.88</b> | 0.28 | <b>1.09</b> | 0.23 | <b>1.24</b>    | <i>0.056</i> |
| 255        | 7           | 7         | <b>0.86</b> | 0.21 | <b>1.06</b> | 0.29 | <b>1.23</b>    | <i>n.s</i>   |
| 295        | 11          | 10        | <b>0.89</b> | 0.28 | <b>0.96</b> | 0.19 | <b>1.07</b>    | <i>n.s</i>   |
| 342        | 9           | 14        | <b>0.93</b> | 0.32 | <b>1.07</b> | 0.23 | <b>1.15</b>    | <i>n.s</i>   |
| 396        | 11          | 12        | <b>0.77</b> | 0.26 | <b>1.01</b> | 0.15 | <b>1.32</b>    | <i>0.010</i> |
| 459        | 13          | 14        | <b>0.99</b> | 0.19 | <b>1.05</b> | 0.25 | <b>1.05</b>    | <i>n.s</i>   |
| 531        | 9           | 17        | <b>0.90</b> | 0.14 | <b>1.02</b> | 0.19 | <b>1.13</b>    | <i>n.s</i>   |
| 615        | 12          | 17        | <b>0.96</b> | 0.18 | <b>1.04</b> | 0.19 | <b>1.09</b>    | <i>n.s</i>   |
| 712        | 12          | 20        | <b>0.84</b> | 0.15 | <b>1.03</b> | 0.23 | <b>1.24</b>    | <i>0.013</i> |
| 825        | 17          | 16        | <b>0.80</b> | 0.23 | <b>1.06</b> | 0.25 | <b>1.33</b>    | <i>0.004</i> |
| 955        | 15          | 14        | <b>0.91</b> | 0.21 | <b>1.03</b> | 0.22 | <b>1.14</b>    | <i>n.s</i>   |
| 1106       | 17          | 13        | <b>0.92</b> | 0.25 | <b>1.08</b> | 0.27 | <b>1.18</b>    | <i>n.s</i>   |
| 1281       | 12          | 15        | <b>0.92</b> | 0.20 | <b>1.06</b> | 0.25 | <b>1.14</b>    | <i>n.s</i>   |
| 1484       | 11          | 10        | <b>0.94</b> | 0.17 | <b>0.97</b> | 0.18 | <b>1.03</b>    | <i>n.s</i>   |
| 1718       | 7           | 13        | <b>1.06</b> | 0.19 | <b>1.07</b> | 0.28 | <b>1.00</b>    | <i>n.s</i>   |
| 1990       | 9           | 7         | <b>0.93</b> | 0.26 | <b>1.09</b> | 0.29 | <b>1.18</b>    | <i>n.s</i>   |
| 2305       | 5           | 3         | <b>1.08</b> | 0.20 | <b>1.04</b> | 0.19 | <b>0.97</b>    | <i>n.s</i>   |
| 2669       | 3           | 3         | <b>1.23</b> | 0.10 | <b>0.96</b> | 0.24 | <b>0.79</b>    | <i>n.s</i>   |
| 3091       | 1           | 1         | <b>1.12</b> |      | <b>1.24</b> |      |                |              |
| 3580       | 4           | 2         | <b>1.11</b> | 0.20 | <b>1.06</b> |      |                |              |
| 4145       | 3           | 2         | <b>0.91</b> | 0.18 | <b>0.91</b> |      |                |              |
| 4801       | 3           | 0         | <b>0.88</b> | 0.41 |             |      |                |              |

max

1.36



**Table S7c – DLS analysis – Numeric data presented in Figure 6c\_IgM**

| rh<br>(nm) | Ctrl<br>(n) | RA<br>(n) | Ctrl IgM    |      | RA IgM      |      | IgM<br>RA/Ctrl | <i>p</i>   |
|------------|-------------|-----------|-------------|------|-------------|------|----------------|------------|
|            |             |           | mean        | SD   | mean        | SD   |                |            |
| 1.7        | 1           | 0         | <b>1.28</b> |      |             |      |                |            |
| 2.7        | 0           | 1         |             |      | <b>0.79</b> |      |                |            |
| 3.6        | 0           | 4         |             |      | <b>0.97</b> | 0.26 |                |            |
| 4.2        | 1           | 1         | <b>0.04</b> |      | <b>0.85</b> |      |                |            |
| 4.8        | 1           | 1         | <b>0.49</b> |      | <b>0.53</b> |      |                |            |
| 5.6        | 3           | 4         | <b>0.53</b> | 0.42 | <b>0.91</b> | 0.29 | <b>1.71</b>    | <i>n.s</i> |
| 6.5        | 4           | 7         | <b>0.61</b> | 0.38 | <b>0.83</b> | 0.42 | <b>1.36</b>    | <i>n.s</i> |
| 7.5        | 8           | 9         | <b>0.54</b> | 0.34 | <b>0.85</b> | 0.43 | <b>1.60</b>    | <i>n.s</i> |
| 8.7        | 13          | 14        | <b>0.90</b> | 0.46 | <b>0.93</b> | 0.33 | <b>1.03</b>    | <i>n.s</i> |
| 10.1       | 12          | 14        | <b>0.90</b> | 0.41 | <b>1.03</b> | 0.43 | <b>1.15</b>    | <i>n.s</i> |
| 11.7       | 12          | 12        | <b>0.84</b> | 0.25 | <b>1.05</b> | 0.48 | <b>1.25</b>    | <i>n.s</i> |
| 13.5       | 16          | 17        | <b>0.80</b> | 0.36 | <b>0.93</b> | 0.41 | <b>1.16</b>    | <i>n.s</i> |
| 15.7       | 19          | 15        | <b>0.96</b> | 0.37 | <b>0.98</b> | 0.43 | <b>1.03</b>    | <i>n.s</i> |
| 18.2       | 15          | 16        | <b>0.73</b> | 0.35 | <b>0.96</b> | 0.39 | <b>1.32</b>    | <i>n.s</i> |
| 21.0       | 17          | 16        | <b>0.87</b> | 0.33 | <b>1.02</b> | 0.39 | <b>1.17</b>    | <i>n.s</i> |
| 24.4       | 20          | 18        | <b>0.82</b> | 0.39 | <b>1.04</b> | 0.45 | <b>1.27</b>    | <i>n.s</i> |
| 28.2       | 10          | 20        | <b>0.83</b> | 0.42 | <b>1.04</b> | 0.41 | <b>1.26</b>    | <i>n.s</i> |
| 32.7       | 18          | 20        | <b>0.80</b> | 0.37 | <b>1.11</b> | 0.40 | <b>1.38</b>    | 0.020      |
| 37.9       | 16          | 15        | <b>0.87</b> | 0.40 | <b>0.97</b> | 0.43 | <b>1.12</b>    | <i>n.s</i> |
| 43.8       | 22          | 16        | <b>0.81</b> | 0.41 | <b>1.11</b> | 0.38 | <b>1.38</b>    | 0.024      |
| 50.8       | 17          | 14        | <b>0.78</b> | 0.43 | <b>1.00</b> | 0.39 | <b>1.28</b>    | <i>n.s</i> |
| 58.8       | 15          | 16        | <b>0.83</b> | 0.43 | <b>0.99</b> | 0.42 | <b>1.19</b>    | <i>n.s</i> |
| 68.0       | 18          | 16        | <b>0.82</b> | 0.37 | <b>0.93</b> | 0.37 | <b>1.14</b>    | <i>n.s</i> |
| 78.8       | 24          | 18        | <b>0.85</b> | 0.38 | <b>0.86</b> | 0.43 | <b>1.01</b>    | <i>n.s</i> |
| 91.2       | 18          | 13        | <b>0.75</b> | 0.35 | <b>1.02</b> | 0.46 | <b>1.36</b>    | <i>n.s</i> |
| 106        | 12          | 18        | <b>0.87</b> | 0.32 | <b>0.95</b> | 0.41 | <b>1.09</b>    | <i>n.s</i> |
| 122        | 20          | 19        | <b>0.91</b> | 0.42 | <b>0.91</b> | 0.41 | <b>1.00</b>    | <i>n.s</i> |
| 142        | 14          | 18        | <b>0.83</b> | 0.34 | <b>1.02</b> | 0.43 | <b>1.23</b>    | <i>n.s</i> |
| 164        | 14          | 15        | <b>0.77</b> | 0.47 | <b>0.98</b> | 0.40 | <b>1.27</b>    | <i>n.s</i> |
| 190        | 11          | 8         | <b>0.97</b> | 0.38 | <b>0.93</b> | 0.35 | <b>0.96</b>    | <i>n.s</i> |
| 220        | 10          | 14        | <b>0.75</b> | 0.41 | <b>1.10</b> | 0.35 | <b>1.47</b>    | 0.032      |
| 255        | 7           | 7         | <b>0.70</b> | 0.44 | <b>1.00</b> | 0.38 | <b>1.42</b>    | <i>n.s</i> |
| 295        | 11          | 10        | <b>0.70</b> | 0.37 | <b>0.83</b> | 0.31 | <b>1.19</b>    | <i>n.s</i> |
| 342        | 9           | 14        | <b>0.89</b> | 0.46 | <b>1.07</b> | 0.33 | <b>1.21</b>    | <i>n.s</i> |
| 396        | 11          | 12        | <b>0.54</b> | 0.33 | <b>0.83</b> | 0.30 | <b>1.54</b>    | 0.040      |
| 459        | 13          | 14        | <b>0.97</b> | 0.34 | <b>1.04</b> | 0.46 | <b>1.07</b>    | <i>n.s</i> |
| 531        | 9           | 17        | <b>0.74</b> | 0.19 | <b>1.03</b> | 0.40 | <b>1.39</b>    | 0.025      |
| 615        | 12          | 17        | <b>0.86</b> | 0.27 | <b>1.04</b> | 0.38 | <b>1.22</b>    | <i>n.s</i> |
| 712        | 12          | 20        | <b>0.74</b> | 0.30 | <b>1.00</b> | 0.40 | <b>1.34</b>    | <i>n.s</i> |
| 825        | 17          | 16        | <b>0.72</b> | 0.38 | <b>0.95</b> | 0.45 | <b>1.31</b>    | <i>n.s</i> |
| 955        | 15          | 14        | <b>0.86</b> | 0.37 | <b>1.01</b> | 0.42 | <b>1.17</b>    | <i>n.s</i> |
| 1106       | 17          | 13        | <b>0.86</b> | 0.34 | <b>1.12</b> | 0.42 | <b>1.29</b>    | <i>n.s</i> |
| 1281       | 12          | 15        | <b>0.76</b> | 0.26 | <b>1.05</b> | 0.44 | <b>1.38</b>    | 0.054      |
| 1484       | 11          | 10        | <b>0.90</b> | 0.32 | <b>1.00</b> | 0.37 | <b>1.11</b>    | <i>n.s</i> |
| 1718       | 7           | 13        | <b>1.10</b> | 0.34 | <b>1.17</b> | 0.42 | <b>1.06</b>    | <i>n.s</i> |
| 1990       | 9           | 7         | <b>0.76</b> | 0.39 | <b>1.04</b> | 0.40 | <b>1.37</b>    | <i>n.s</i> |
| 2305       | 5           | 3         | <b>1.08</b> | 0.46 | <b>1.31</b> | 0.11 | <b>1.21</b>    | <i>n.s</i> |
| 2669       | 3           | 3         | <b>1.18</b> | 0.48 | <b>1.17</b> | 0.18 | <b>0.91</b>    | <i>n.s</i> |
| 3091       | 1           | 1         | <b>1.46</b> |      | <b>1.33</b> |      |                |            |
| 3580       | 4           | 2         | <b>0.89</b> | 0.28 | <b>0.94</b> |      |                |            |
| 4145       | 3           | 2         | <b>0.58</b> | 0.21 | <b>1.07</b> |      |                |            |
| 4801       | 3           | 0         | <b>0.69</b> | 0.46 |             |      |                |            |

**Table S8.** Distribution of CIC particles in CIC of RA ACPA+RF+ and ACPA-RF- RA patients.

| rh<br>(nm)  | ACPA+RF+<br>(n=20) |     | ACPA+RF-<br>(n=6) |     | <i>p</i>     |
|-------------|--------------------|-----|-------------------|-----|--------------|
|             | with               | w/o | with              | w/o |              |
| 1.7         |                    |     |                   |     |              |
| 2.7         | 1                  | 19  | 0                 | 6   | <i>n.s.</i>  |
| 3.6         | 3                  | 17  | 0                 | 6   | <i>n.s.</i>  |
| 4.2         | 1                  | 19  | 0                 | 6   | <i>n.s.</i>  |
| 4.8         | 0                  | 20  | 1                 | 5   | <i>n.s.</i>  |
| 5.6         | 2                  | 18  | 1                 | 5   | <i>n.s.</i>  |
| 6.5         | 5                  | 15  | 1                 | 5   | <i>n.s.</i>  |
| 7.5         | 7                  | 13  | 2                 | 4   | <i>n.s.</i>  |
| 8.7         | 10                 | 10  | 3                 | 3   | <i>n.s.</i>  |
| 10.1        | 10                 | 10  | 3                 | 3   | <i>n.s.</i>  |
| 11.7        | 7                  | 13  | 4                 | 2   | <i>n.s.</i>  |
| 13.5        | 11                 | 9   | 3                 | 3   | <i>n.s.</i>  |
| 15.7        | 9                  | 11  | 4                 | 2   | <i>n.s.</i>  |
| 18.2        | 10                 | 10  | 2                 | 4   | <i>n.s.</i>  |
| 21.0        | 13                 | 7   | 4                 | 2   | <i>n.s.</i>  |
| 24.4        | 13                 | 7   | 4                 | 2   | <i>n.s.</i>  |
| 28.2        | 12                 | 8   | 4                 | 2   | <i>n.s.</i>  |
| <b>32.7</b> | 14                 | 6   | 1                 | 5   | <i>0.054</i> |
| 37.9        | 10                 | 10  | 3                 | 3   | <i>n.s.</i>  |
| 43.8        | 11                 | 9   | 2                 | 4   | <i>n.s.</i>  |
| 50.8        | 10                 | 10  | 2                 | 4   | <i>n.s.</i>  |
| 58.8        | 10                 | 10  | 2                 | 4   | <i>n.s.</i>  |
| 68.0        | 11                 | 9   | 4                 | 2   | <i>n.s.</i>  |
| 78.8        | 10                 | 10  | 3                 | 3   | <i>n.s.</i>  |
| 91.2        | 9                  | 11  | 4                 | 2   | <i>n.s.</i>  |
| 106         | 11                 | 9   | 5                 | 1   | <i>n.s.</i>  |
| 122         | 11                 | 9   | 2                 | 4   | <i>n.s.</i>  |

|             |    |    |   |   |              |
|-------------|----|----|---|---|--------------|
| 142         | 14 | 6  | 2 | 4 | <i>n.s.</i>  |
| 164         | 10 | 10 | 2 | 4 | <i>n.s.</i>  |
| 190         | 4  | 16 | 2 | 4 | <i>n.s.</i>  |
| 220         | 9  | 11 | 1 | 5 | <i>n.s.</i>  |
| 255         | 4  | 16 | 4 | 2 | <i>n.s.</i>  |
| 295         | 4  | 16 | 3 | 3 | <i>n.s.</i>  |
| 342         | 10 | 10 | 4 | 2 | <i>n.s.</i>  |
| <b>396</b>  | 7  | 13 | 5 | 1 | <i>0.065</i> |
| 459         | 7  | 13 | 3 | 3 | <i>n.s.</i>  |
| 531         | 11 | 9  | 4 | 2 | <i>n.s.</i>  |
| 615         | 11 | 9  | 5 | 1 | <i>n.s.</i>  |
| 712         | 13 | 7  | 5 | 1 | <i>n.s.</i>  |
| 825         | 10 | 10 | 4 | 2 | <i>n.s.</i>  |
| 955         | 9  | 11 | 1 | 5 | <i>n.s.</i>  |
| 1106        | 11 | 9  | 3 | 3 | <i>n.s.</i>  |
| <b>1281</b> | 12 | 8  | 0 | 6 | <i>0.017</i> |
| 1484        | 10 | 10 | 1 | 5 | <i>n.s.</i>  |
| <b>1718</b> | 10 | 10 | 0 | 6 | <i>0.053</i> |
| 1990        | 6  | 14 | 0 | 6 | <i>n.s.</i>  |
| 2305        | 3  | 17 | 0 | 6 | <i>n.s.</i>  |
| 2669        | 2  | 18 | 0 | 6 | <i>n.s.</i>  |
| 3091        | 1  | 19 | 0 | 6 | <i>n.s.</i>  |
| 3580        | 1  | 19 | 1 | 5 | <i>n.s.</i>  |
| 4145        | 1  | 19 | 0 | 6 | <i>n.s.</i>  |
| 4801        |    |    |   |   |              |
